# Supplementary material for: Recycled and flexible boron nitride heat spread film with high thermal conductivity
Source: Royal Society of Chemistry journal article supplement (doi:10.1039/d3tc02761a), 2023-01-01
Supplement: d3tc02761a1.pdf [file d3tc02761a1.pdf]

## **Recycled and Flexible Boron Nitride Heat Spread Film with High Thermal Conductivity**

Jianxiang Zhang <sup>a, b</sup>, Xiangdong Kong <sup>a, b</sup>, Yandong Wang <sup>b</sup>, Zhenbang Zhang <sup>b</sup>, Linhong Li <sup>b</sup>, Kang Xu <sup>b</sup>, Maohua Li <sup>b</sup>, Rongjie Yang <sup>b</sup>, Yiwei Zhou <sup>b</sup>, Tao Cai <sup>b</sup>, Wen Dai <sup>b</sup>, Cheng-Te Lin <sup>b, c</sup>, Kazuhito Nishimura <sup>b</sup>, Zhongbin Pan <sup>a, \*</sup>, Nan Jiang <sup>b, c, \*</sup>, Jinhong Yu <sup>b, c, \*</sup>

<sup>a</sup> School of Materials Science and Chemical Engineering, Ningbo University, Ningbo, Zhejiang 315211, China.

<sup>b</sup> Key Laboratory of Marine Materials and Related Technologies, Zhejiang Key Laboratory of Marine Materials and Protective Technologies, Ningbo Institute of Materials Technology and Engineering, Chinese Academy of Sciences, Ningbo 315201, China.

<sup>c</sup> Center of Materials Science and Optoelectronics Engineering, University of Chinese Academy of Sciences, Beijing, 100049, China.

**\*Correspondence and requests for materials should be addressed to Z. Pan (Email: panzhongbin@163.com); N. Jiang (jiangnan@nimte.ac.cn) or J. Yu (Email: yujinhong@nimte.ac.cn)**

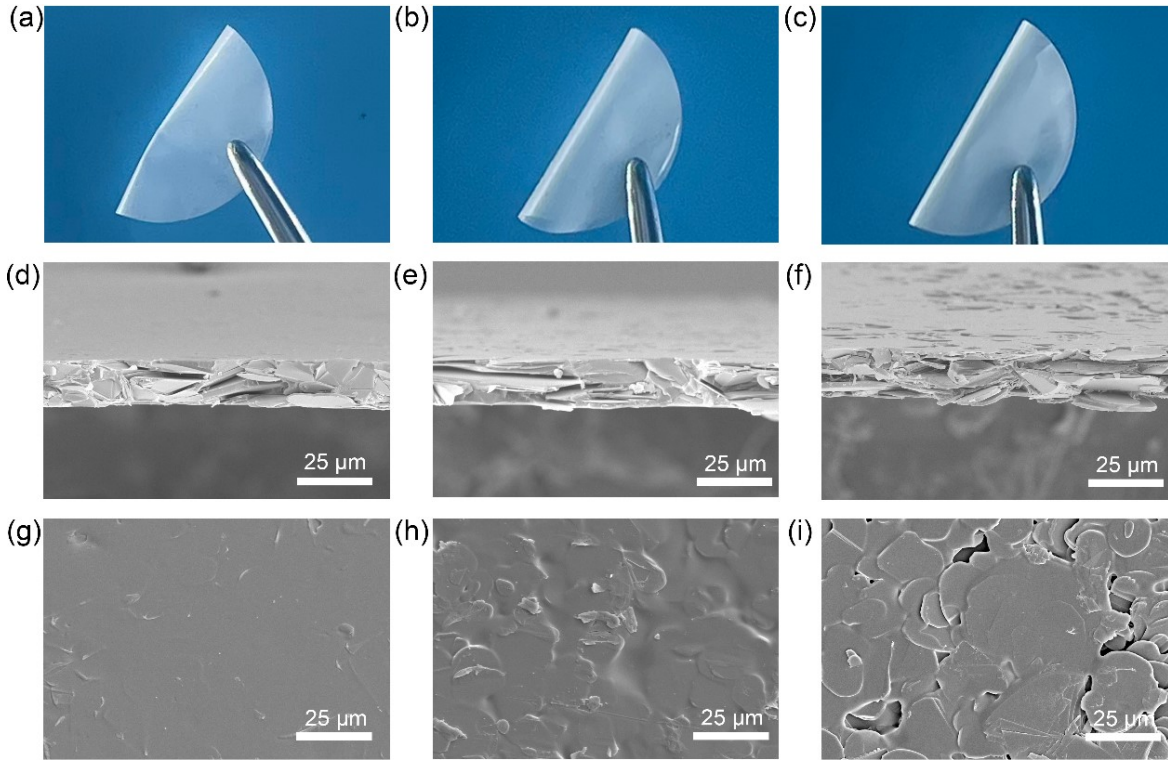

**Figure.S1** (a-c) Digital photographs of 55,65 and 75wt% BNHS-VHP composite films. (d-f) Cross-sectional SEM images of 55,65 and 75wt% BNHS-VHP composite films. (g-i) Surface SEM images of 55,65 and 75wt% BNHS-VHP composite films.

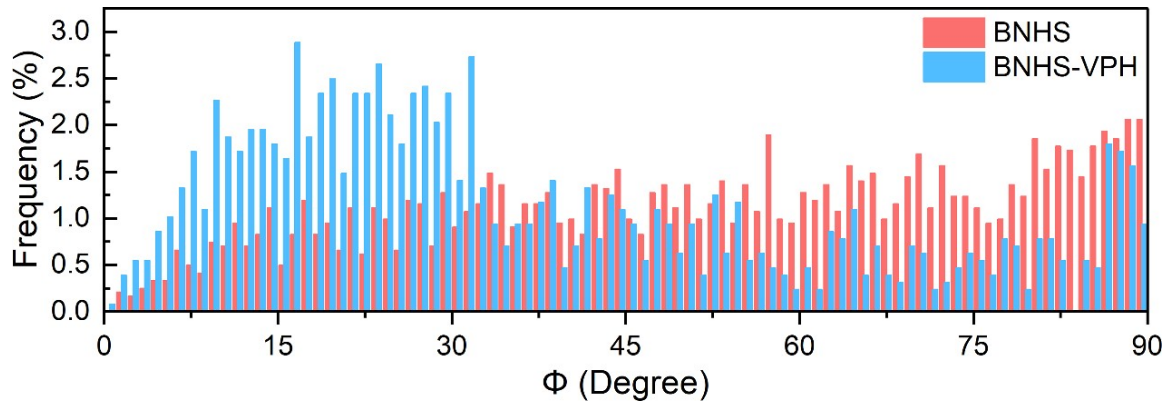

**Figure.S2** Frequency distribution plot of the angle  $\Phi$  between the direction of the normal vector to the h-BN and the through-plane direction, based on the micro-CT model.

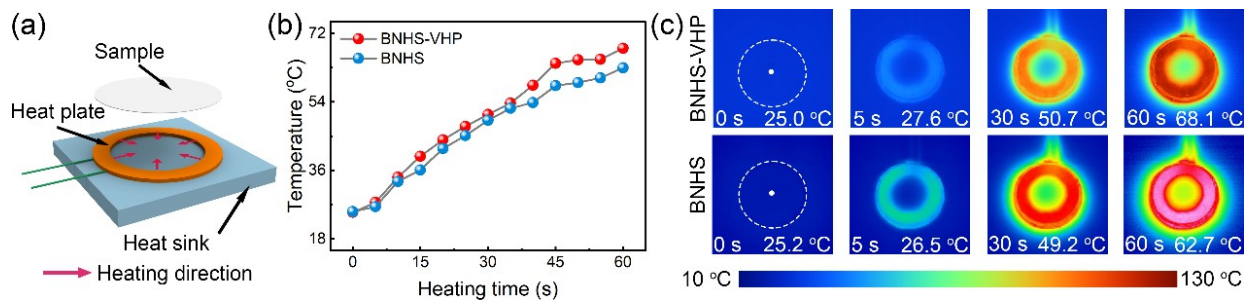

**Figure.S3** (a) Schematic of the experimental setup. (b) The central temperature change of the BNHS and BNHS-VHP as a function of running time. (c) IR images corresponding to the BNHS and BNHS-VHP

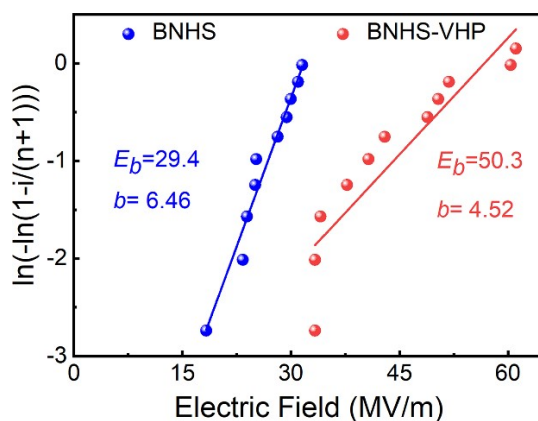

**Figure.S4** Weibull plots and determined characteristic breakdown strength.

As a heat spread film for electronic devices, the electrical insulation performance of the composite material film is also of great concern. The values of  $E_b$  for BNHS and BNHS-VHP were obtained from a two-parameter Weibull statistical analysis. Fig. S5 presents the  $E_b$  and  $b$  values for BNHS and BNHS-VHP. It can be observed from the test results that the non-vacuum hot-pressed BNHS exhibits a lower  $E_b$  compared to BNHS-VHP. This can be attributed to the presence of surface defects and a higher number of voids in the non-vacuum hot-pressed BNHS. In contrast, the vacuum hot-pressing process applied to BNHS-VHP reduces the presence of voids, resulting in enhanced density and a decreased presence of defects. Therefore, the  $E_b$  value for BNHS-VHP is higher than that of BNHS. Furthermore, the  $b$  value for BNHS is larger, indicating a less uniform distribution compared to BNHS-VHP. This further demonstrates that the vacuum hot-pressed BNHS-VHP exhibits

improved dielectric performance.

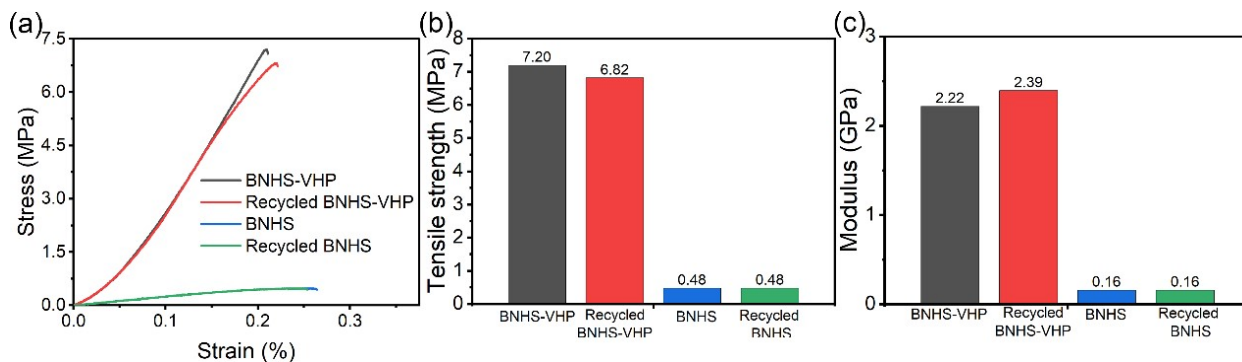

**Figure.S5** The mechanical properties of the composite films. (a) The stress–strain curves, (b) tensile strength, (c) Young's modulus of the different composite films.

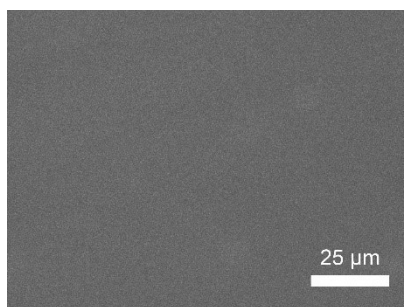

**Figure. S6** Surface SEM images of pure PVB films.

**Table S1.** BNHS and BNHS-VHP heat spread films surface roughness.

|     | BNHS        | BNHS-VHP    |
|-----|-------------|-------------|
| Sa  | 7.26 μm     | 2.32 μm     |
| Sz  | 93.27 μm    | 54.80 μm    |
| Str | 0.86        | 0.88        |
| Spc | 712.69 1/mm | 573.34 1/mm |
| Sdr | 0.4512      | 0.1876      |

**Table S2.** The parameters for the calculation of in-plane thermal conductivities of BNHS and BNHS-VHP composite films at 25°C.

| Sample   | Thermal diffusivity (mm <sup>2</sup> s <sup>-1</sup> ) | Specific heat capacity (J g <sup>-1</sup> K <sup>-1</sup> ) | Density (g cm <sup>-3</sup> ) | Thermal conductivity (W m <sup>-1</sup> K <sup>-1</sup> ) |
|----------|--------------------------------------------------------|-------------------------------------------------------------|-------------------------------|-----------------------------------------------------------|
| BNHS-VHP | 44.691                                                 | 0.998                                                       | 1.647                         | 73.459                                                    |
|          | 44.565                                                 |                                                             |                               | 73.252                                                    |
|          | 44.674                                                 |                                                             |                               | 73.431                                                    |
| BNHS     | 23.480                                                 | 0.983                                                       | 0.803                         | 18.533                                                    |
|          | 23.441                                                 |                                                             |                               | 18.503                                                    |
|          | 23.247                                                 |                                                             |                               | 18.350                                                    |

**Table S3.** The parameters for the calculation of through-plane thermal conductivities of BNHS-VHP and BNHS composite films at 25°C.

| Sample   | Thermal diffusivity (mm <sup>2</sup> s <sup>-1</sup> ) | Specific heat capacity (J g <sup>-1</sup> K <sup>-1</sup> ) | Density (g cm <sup>-3</sup> ) | Thermal conductivity (W m <sup>-1</sup> K <sup>-1</sup> ) |
|----------|--------------------------------------------------------|-------------------------------------------------------------|-------------------------------|-----------------------------------------------------------|
| BNHS-VHP | 0.150                                                  | 0.998                                                       | 1.647                         | 0.247                                                     |
|          | 0.150                                                  |                                                             |                               | 0.247                                                     |
|          | 0.149                                                  |                                                             |                               | 0.245                                                     |
| BNHS     | 1.896                                                  | 0.983                                                       | 0.803                         | 1.497                                                     |
|          | 1.878                                                  |                                                             |                               | 1.482                                                     |
|          | 1.879                                                  |                                                             |                               | 1.483                                                     |

**Table S4.** A comparison of the In-plane thermal conductivity of composite films with different h-BN contents after vacuum hot-pressing at 25°C.

| h-BN content<br>(wt%) | Thermal<br>diffusivity<br>(mm <sup>2</sup> s <sup>-1</sup> ) | Specific heat<br>capacity<br>(J g <sup>-1</sup> K <sup>-1</sup> ) | Density<br>(g cm <sup>-3</sup> ) | Thermal<br>conductivity<br>(W m <sup>-1</sup> K <sup>-1</sup> ) |
|-----------------------|--------------------------------------------------------------|-------------------------------------------------------------------|----------------------------------|-----------------------------------------------------------------|
|                       | 19.794                                                       |                                                                   |                                  | 22.228                                                          |
| 55                    | 18.988                                                       | 1.110                                                             | 1.012                            | 21.323                                                          |
|                       | 18.698                                                       |                                                                   |                                  | 21.516                                                          |
|                       | 24.559                                                       |                                                                   |                                  | 30.497                                                          |
| 65                    | 22.935                                                       | 1.050                                                             | 1.183                            | 28.481                                                          |
|                       | 22.650                                                       |                                                                   |                                  | 28.127                                                          |
|                       | 37.237                                                       |                                                                   |                                  | 47.413                                                          |
| 75                    | 36.334                                                       | 1.001                                                             | 1.272                            | 46.263                                                          |
|                       | 36.229                                                       |                                                                   |                                  | 46.129                                                          |
|                       | 44.691                                                       |                                                                   |                                  | 73.459                                                          |
| 85                    | 44.565                                                       | 0.998                                                             | 1.647                            | 73.252                                                          |
|                       | 44.674                                                       |                                                                   |                                  | 73.431                                                          |

**Table S5.** Comparison of thermal conductivity of composite films with different BN contents.

| Samples      | BN loading (wt%) | TC ( $\text{W m}^{-1} \text{K}^{-1}$ ) | Ref.      |
|--------------|------------------|----------------------------------------|-----------|
| PVA/BNNS     | 22.2             | 21.4                                   | S1        |
| BNNS-OH/CNF  | 25               | 22.67                                  | S2        |
| ANF/BNNS     | 30               | 46.7                                   | S3        |
| ND/BNNS/PVA  | 30               | 15.49                                  | S4        |
| PVDF/BNNS    | 33               | 16.3                                   | S5        |
| ANF/BNNS@Ag  | 40               | 11.51                                  | S6        |
| BNNS/CNF     | 50               | 24.66                                  | S7        |
| BNNS/EVA     | 50               | 13.2                                   | S8        |
| CNF/OH-BNNS  | 50               | 15.13                                  | S9        |
| BNNS-GFS/CNF | 67.5             | 55.65                                  | S10       |
| BNNS-Gly/CNF | 70               | 16.2                                   | S11       |
| BN/PVB       | 85               | 73.38                                  | This work |

## Reference

- (S1) J. Chen, H. Wei, H. Bao, P. Jiang and X. Huang, *ACS Appl. Mater. Interfaces*, 2019, 11, 31402–31410
- (S2) Z. Hu, S. Wang, G. Chen, Q. Zhang, K. Wu, J. Shi, L. Liang and M. Lu, *Compos. Sci. Technol.*, 2018, 168, 287–295.
- (S3) K. Wu, J. Wang, D. Liu, C. Lei, D. Liu, W. Lei and Q. Fu, *Adv. Mater.*, 2020, 32, 1906939.
- (S4) K. Zhao, G. Liu, W. Cao, Z. Su, J. Zhao, J. Han, B. Dai, K. Cao and J. Zhu, *POLYMER*, , DOI:10.1016/j.polymer.2020.122885.
- (S5) J. Chen, X. Huang, B. Sun and P. Jiang, *ACS Nano*, 2019, 13, 337–345.
- (S6) L.-H. Zhao, Y. Liao, L.-C. Jia, Z. Wang, X.-L. Huang, W.-J. Ning, Z.-X. Zhang and J.-W. Ren, *Polymers*, 2021, 13, 2028.
- (S7) L. Chen, C. Xiao, Y. Tang, X. Zhang, K. Zheng and X. Tian, *Ceram. Int.*, 2019, 45, 12965–12974.
- (S8) Z.-G. Wang, W. Liu, Y.-H. Liu, Y. Ren, Y.-P. Li, L. Zhou, J.-Z. Xu, J. Lei and Z.-M. Li, *Compos. PART B-Eng.*, , DOI:10.1016/j.compositesb.2019.107569.
- (S9) D. Hu, W. Ma, Z. Zhang, Y. Ding and L. Wu, *ACS Appl. Mater. Interfaces*, 2020, 12, 11115–11125.
- (S10) W. Qiu, W. Lin, Y. Tuersun, M. Ou and S. Chu, *Adv. Mater. INTERFACES*, , DOI:10.1002/admi.202002187.
- (S11) X. Tian, N. Wu, B. Zhang, Y. Wang, Z. Geng and Y. Li, *Chem. Eng. J.*, 2021, 408, 127360.
